# Supplementary material for: A Novel Approach to High-Quality Postmortem Tissue Procurement: The GTEx Project
Source: PubMed Central journal article supplement — Biopreserv Biobank. 2015 Oct 1;13(5):311–9. doi: 10.1089/bio.2015.0032 (PMC4675181; doi:10.1089/bio.2015.0032), 2015-10-01
Supplement: Supp_Table1.pdf [file Supp_Table1.pdf]

## Supplementary Data

SUPPLEMENTARY TABLE S1. PERCENTAGE OF TISSUES WITH RIN VALUES GREATER THAN 6 BY TISSUE TYPE

| Tissue Type                        | Total Specimens with RIN | # Specimens with RIN>6 | % Specimens with RIN >6 |
|------------------------------------|--------------------------|------------------------|-------------------------|
| Minor Salivary Glands              | 14                       | 14                     | 100                     |
| Blood, Whole                       | 180                      | 171                    | 95                      |
| Skin- Sun Exposed (Lower Leg)      | 189                      | 175                    | 93                      |
| Muscle- Skeletal                   | 188                      | 166                    | 88                      |
| Esophagus- Mucosa                  | 181                      | 143                    | 79                      |
| Lung                               | 171                      | 135                    | 79                      |
| Heart- Atrial Appendage            | 48                       | 37                     | 77                      |
| Artery- Tibial                     | 187                      | 142                    | 76                      |
| Thyroid Gland                      | 167                      | 124                    | 74                      |
| Fallopian Tube                     | 42                       | 30                     | 71                      |
| Ovary                              | 58                       | 41                     | 71                      |
| Brain- Cerebellum                  | 45                       | 31                     | 69                      |
| Cervix- Ectocervix                 | 37                       | 25                     | 68                      |
| Nerve- Tibial                      | 184                      | 124                    | 67                      |
| Uterus                             | 52                       | 35                     | 67                      |
| Adipose Tissue- Subcutaneous       | 188                      | 126                    | 67                      |
| Esophagus- Muscularis              | 184                      | 121                    | 66                      |
| Vagina                             | 63                       | 41                     | 65                      |
| Testis                             | 120                      | 78                     | 65                      |
| Heart- Left Ventricle              | 153                      | 99                     | 65                      |
| Brain- Cortex                      | 46                       | 29                     | 63                      |
| Gastroesophageal Junction          | 56                       | 33                     | 59                      |
| Skin- Not Sun Exposed (Suprapubic) | 58                       | 34                     | 59                      |
| Urinary Bladder                    | 127                      | 74                     | 58                      |
| Cervix- Endocervix                 | 38                       | 22                     | 58                      |
| Artery- Aorta                      | 173                      | 100                    | 58                      |
| Artery- Coronary                   | 141                      | 78                     | 55                      |
| Colon- Transverse                  | 188                      | 102                    | 54                      |
| Mammary Tissue (Breast)            | 131                      | 71                     | 54                      |
| Adipose Tissue- Visceral (Omentum) | 58                       | 31                     | 53                      |
| Stomach                            | 186                      | 98                     | 53                      |
| Pituitary Gland                    | 45                       | 23                     | 51                      |
| Adrenal Glands                     | 141                      | 72                     | 51                      |
| Ileum                              | 55                       | 27                     | 49                      |
| Liver                              | 109                      | 53                     | 49                      |
| Pancreas                           | 174                      | 84                     | 48                      |
| Colon- Sigmoid                     | 58                       | 27                     | 47                      |
| Prostate                           | 116                      | 54                     | 47                      |
| Spleen                             | 175                      | 45                     | 26                      |
| Kidney- Medulla                    | 47                       | 9                      | 19                      |
| Kidney- Cortex                     | 85                       | 11                     | 13                      |
