# Supplementary material for: A Novel Approach to High-Quality Postmortem Tissue Procurement: The GTEx Project
Source: PubMed Central journal article supplement — Biopreserv Biobank. 2015 Oct 1;13(5):311–9. doi: 10.1089/bio.2015.0032 (PMC4675181; doi:10.1089/bio.2015.0032), 2015-10-01
Supplement: Supp_Table2.pdf [file Supp_Table2.pdf]

SUPPLEMENTARY TABLE S2. CORRELATION BETWEEN ISCHEMIC TIME AND RIN VALUES (N=190)

| PMI Range (hours) | Number of Tissues | % of Tissues RIN > 6 |
|-------------------|-------------------|----------------------|
| 2-3               | 43                | 93.0%                |
| 3-4               | 742               | 86.5%                |
| 4-5               | 743               | 82.9%                |
| 5-6               | 446               | 83.0%                |
| 6-7               | 235               | 76.6%                |
| 7-8               | 106               | 85.8%                |
| 8-9               | 245               | 52.7%                |
| 9-10              | 162               | 60.5%                |
| 10-11             | 142               | 38.0%                |
| 11-12             | 146               | 48.6%                |
| 12-13             | 134               | 36.6%                |
| 13-14             | 229               | 50.2%                |
| 14-15             | 231               | 35.5%                |
| 15-16             | 82                | 20.7%                |
| 16-17             | 255               | 42.0%                |
| 17-18             | 56                | 58.9%                |
| 18-19             | 132               | 37.9%                |
| 19-20             | 118               | 25.4%                |
| 20-21             | 85                | 54.1%                |
| 21-22             | 59                | 67.8%                |
| 22-23             | 79                | 29.1%                |
| >23               | 188               | 24.5%                |
